# Supplementary figures and images for: Novel functionalized pyridine-containing DTPA-like ligand. Synthesis, computational studies and characterization of the corresponding GdIII complex
Source: Royal Society of Chemistry journal article supplement (doi:10.1039/b706236b), 2007-01-01

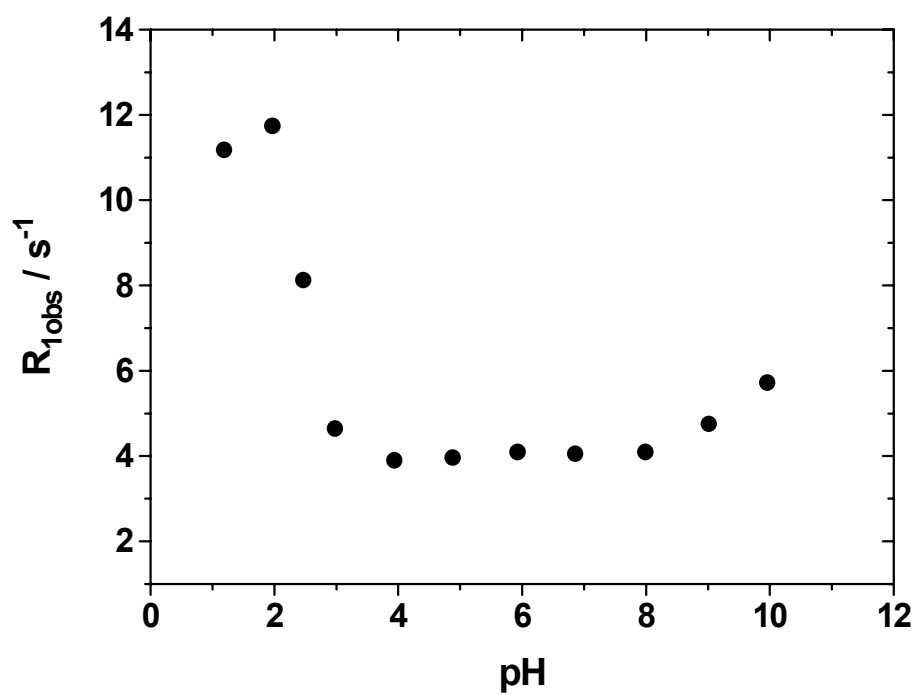

**Figure S1**  
pH-dependence of relaxation rate (Gd-1, 20 MHz, 298K)

Supplement: b706236b.pdf [file b706236b.pdf]
